# Supplementary material for: Searching large-scale scRNA-seq databases via unbiased cell embedding with Cell BLAST
Source: PubMed Central journal article supplement (PMC7351785; doi:10.1038/s41467-020-17281-7), 2020-07-10
Supplement: 41467_2020_17281_MOESM7_ESM.pdf [file 41467_2020_17281_MOESM7_ESM.pdf]

## Reporting Summary

Nature Research wishes to improve the reproducibility of the work that we publish. This form provides structure for consistency and transparency in reporting. For further information on Nature Research policies, see [Authors & Referees](#) and the [Editorial Policy Checklist](#).

### Statistics

For all statistical analyses, confirm that the following items are present in the figure legend, table legend, main text, or Methods section.

n/a Confirmed

- The exact sample size ( $n$ ) for each experimental group/condition, given as a discrete number and unit of measurement
- A statement on whether measurements were taken from distinct samples or whether the same sample was measured repeatedly
- The statistical test(s) used AND whether they are one- or two-sided  
*Only common tests should be described solely by name; describe more complex techniques in the Methods section.*
- A description of all covariates tested
- A description of any assumptions or corrections, such as tests of normality and adjustment for multiple comparisons
- A full description of the statistical parameters including central tendency (e.g. means) or other basic estimates (e.g. regression coefficient) AND variation (e.g. standard deviation) or associated estimates of uncertainty (e.g. confidence intervals)
- For null hypothesis testing, the test statistic (e.g.  $F$ ,  $t$ ,  $r$ ) with confidence intervals, effect sizes, degrees of freedom and  $P$  value noted  
*Give  $P$  values as exact values whenever suitable.*
- For Bayesian analysis, information on the choice of priors and Markov chain Monte Carlo settings
- For hierarchical and complex designs, identification of the appropriate level for tests and full reporting of outcomes
- Estimates of effect sizes (e.g. Cohen's  $d$ , Pearson's  $r$ ), indicating how they were calculated

*Our web collection on [statistics for biologists](#) contains articles on many of the points above.*

### Software and code

Policy information about [availability of computer code](#)

Data collection

Code used for data collection is deposited at [https://github.com/gao-lab/Cell\\_BLAST](https://github.com/gao-lab/Cell_BLAST).

Data analysis

Code and environment configuration necessary for reproducing analysis results are deposited at [https://github.com/gao-lab/Cell\\_BLAST](https://github.com/gao-lab/Cell_BLAST). Specific software used include R packages: irlba (v2.3.3), Rtsne (v0.15), zinbwave (v1.6.0), sva (v3.32.1), scran (v1.6.9), Seurat (v2.3.3 and v3.0.2), harmony (v1.0), scmap (v1.6.0); Julia package: CellFishing.jl (v0.3.0); Python packages: gseapy (v0.9.16), umap-learn (v0.3.8), scPhere (v0.1.0), ZIFA (v0.1), Dhaka (v0.1), DCA (v0.2.2), scVI (v0.2.3), scScope (v0.1.5), SAUCIE (commit c2e59683ddf401f07d4c226a420b367181934715), Cell-BLAST (v0.3.7).

For manuscripts utilizing custom algorithms or software that are central to the research but not yet described in published literature, software must be made available to editors/reviewers. We strongly encourage code deposition in a community repository (e.g. GitHub). See the Nature Research [guidelines for submitting code & software](#) for further information.

### Data

Policy information about [availability of data](#)

All manuscripts must include a [data availability statement](#). This statement should provide the following information, where applicable:

- Accession codes, unique identifiers, or web links for publicly available datasets
- A list of figures that have associated raw data
- A description of any restrictions on data availability

All scRNA-seq datasets used in this study were obtained from public data repositories, with detailed information including accession codes and URLs available in Supplementary Data 2. Source data for the benchmark experiments are available in Supplementary Data 4. Curated datasets in ACA are available through our Web portal <https://cblast.gao-lab.org/download>.

## Field-specific reporting

Please select the one below that is the best fit for your research. If you are not sure, read the appropriate sections before making your selection.

- Life sciences       Behavioural & social sciences       Ecological, evolutionary & environmental sciences

For a reference copy of the document with all sections, see [nature.com/documents/nr-reporting-summary-flat.pdf](https://www.nature.com/documents/nr-reporting-summary-flat.pdf)

## Life sciences study design

All studies must disclose on these points even when the disclosure is negative.

|                 |                                                                                                                                                                                             |
|-----------------|---------------------------------------------------------------------------------------------------------------------------------------------------------------------------------------------|
| Sample size     | All computational experiments were repeated multiple times using different random initializations (N values indicated in figure legends), to evaluate algorithmic stability.                |
| Data exclusions | No data were excluded from analysis.                                                                                                                                                        |
| Replication     | All computational experiments were assembled using Snakemake and environment configuration files are provided to ensure exact reproducibility. All attempts at replication were successful. |
| Randomization   | Not applicable since no biological experiment was involved.                                                                                                                                 |
| Blinding        | Not applicable since no biological experiment was involved.                                                                                                                                 |

## Reporting for specific materials, systems and methods

We require information from authors about some types of materials, experimental systems and methods used in many studies. Here, indicate whether each material, system or method listed is relevant to your study. If you are not sure if a list item applies to your research, read the appropriate section before selecting a response.

### Materials & experimental systems

| n/a                                 | Involvement in the study                             |
|-------------------------------------|------------------------------------------------------|
| <input checked="" type="checkbox"/> | <input type="checkbox"/> Antibodies                  |
| <input checked="" type="checkbox"/> | <input type="checkbox"/> Eukaryotic cell lines       |
| <input checked="" type="checkbox"/> | <input type="checkbox"/> Palaeontology               |
| <input checked="" type="checkbox"/> | <input type="checkbox"/> Animals and other organisms |
| <input checked="" type="checkbox"/> | <input type="checkbox"/> Human research participants |
| <input checked="" type="checkbox"/> | <input type="checkbox"/> Clinical data               |

### Methods

| n/a                                 | Involvement in the study                        |
|-------------------------------------|-------------------------------------------------|
| <input checked="" type="checkbox"/> | <input type="checkbox"/> ChIP-seq               |
| <input checked="" type="checkbox"/> | <input type="checkbox"/> Flow cytometry         |
| <input checked="" type="checkbox"/> | <input type="checkbox"/> MRI-based neuroimaging |
