# Supplementary material for: Searching large-scale scRNA-seq databases via unbiased cell embedding with Cell BLAST
Source: PubMed Central journal article supplement (PMC7351785; doi:10.1038/s41467-020-17281-7), 2020-07-10
Supplement: 41467_2020_17281_MOESM8_ESM.pdf [file 41467_2020_17281_MOESM8_ESM.pdf]

**Title:** Supplementary Data 1

**Description:** Cell type composition in datasets used for batch effect correction benchmarking.

**Title:** Supplementary Data 2

**Description:** Detailed information for datasets in ACA.

**Title:** Supplementary Data 3

**Description:** Expected prediction matrices for query-based cell typing.

**Title:** Supplementary Data 4

**Description:** Source data for all benchmarking experiments.

**Title:** Supplementary Software

**Description:** The Cell BLAST Python package.
